# Supplementary material for: Self-assembled main-chain poly(bile acid) membranes that wrinkle
Source: Royal Society of Chemistry journal article supplement (doi:10.1039/c3py00962a), 2013-09-02
Supplement: c3py00962a.pdf [file c3py00962a.pdf]

Electronic Supplementary Information (ESI) for

## Self-assembled main chain poly(bile acid)s membranes that wrinkle

Weina Li,<sup>a,b,c</sup> Tian Tian,<sup>a</sup> Yue Lan,<sup>a</sup> Wei Zhu,<sup>a</sup> Jian Li,<sup>a</sup> Meng Zhang,<sup>a,b</sup> Yong Ju<sup>\*b</sup> and Guangtao Li<sup>\*a</sup>

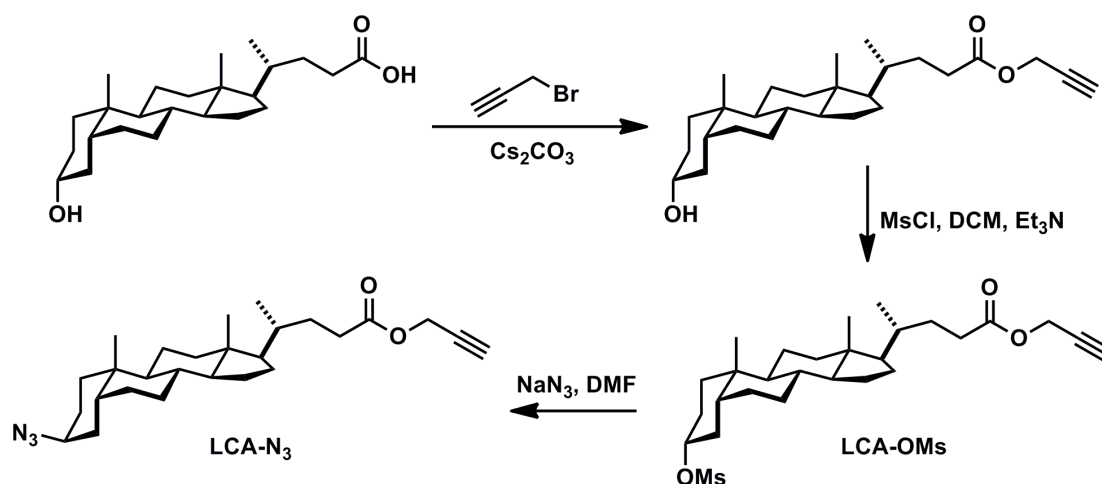

**Scheme S1** The synthesis procedure of terminal alkyne and azide functionalized lithocholic acid derivatives.

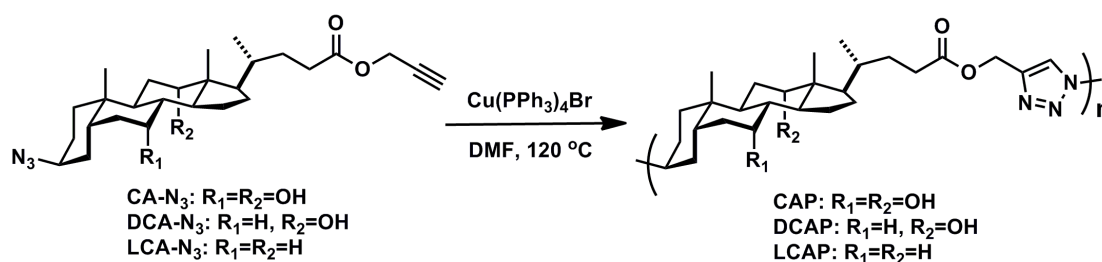

**Scheme S2** The synthesis procedure of poly(bile acid)s.
